# Supplementary material for: Positive mental health literacy: development and validation of a measure among Norwegian adolescents
Source: BMC Public Health. 2017 Sep 18;17:717. doi: 10.1186/s12889-017-4733-6 (PMC5604188; doi:10.1186/s12889-017-4733-6)
Supplement: Additional file 1: — MHPK-10 instrument. A copy of the 10-item MHPK instrument that measures adolescents’ knowledge of how to obtain and maintain good mental health. (PDF 105 kb) [file 12889_2017_4733_MOESM1_ESM.pdf]

## WHAT IS IMPORTANT FOR GOOD MENTAL HEALTH?

Here are 10 statements about things that can be important for good mental health.

On the scale from 1 to 5, how correct is each statement?

[illegible]
